# Supplementary material for: Structural view on the role of the TRD loop in regulating DNMT3A activity: a molecular dynamics study
Source: Royal Society of Chemistry journal article supplement (doi:10.1039/d2cp02031a), 2022-01-01
Supplement: d2cp02031a1.pdf [file d2cp02031a1.pdf]

## SUPPORTING INFORMATION

### **Structural view on the role of TRD loop in regulating DNMT3A activity: a molecular dynamics study**

Hong Zhao<sup>1,3</sup>, Jie Yu<sup>1</sup>, Gaoqi Weng<sup>1</sup>, Jiahui Yu<sup>1</sup>, Ercheng Wang<sup>1</sup>, Junbo Gao<sup>1</sup>,  
Huanxiang Liu<sup>2</sup>, Tingjun Hou<sup>1</sup>, Zhe Wang\*<sup>1</sup>, Yu Kang\*<sup>1</sup>

*<sup>1</sup>College of Pharmaceutical Sciences, Zhejiang University, Hangzhou 310058, Zhejiang, China*

*<sup>2</sup>Faculty of Applied Science, Macao Polytechnic University, Macao, SAR, China*

*<sup>3</sup>Alibaba-Zhejiang University Joint Research Center of Future Digital Healthcare*

#### **Corresponding authors**

**Zhe Wang**

E-mail: wangzhehyd@zju.edu.cn

**Yu Kang**

E-mail: yukang@zju.edu.cn

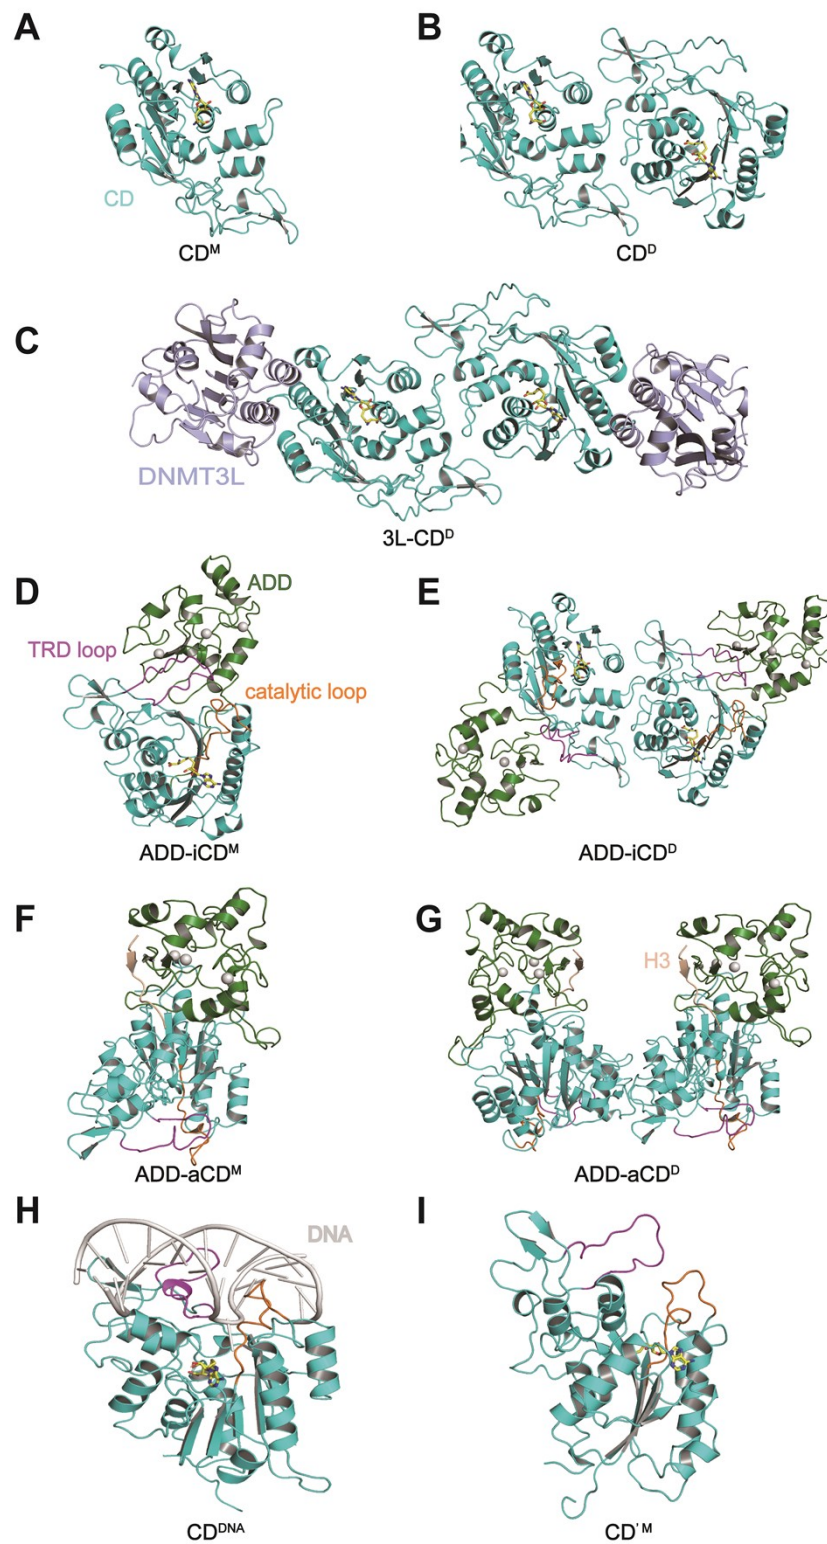

**Figure S1.** The initial structures of the systems CD<sup>M</sup>, CD<sup>D</sup>, 3L-CD<sup>D</sup>, ADD-iCD<sup>M</sup>, ADD-iCD<sup>D</sup>, ADD-aCD<sup>M</sup>, ADD-aCD<sup>D</sup>, CD<sup>DNA</sup> and CD<sup>M</sup> for the molecular dynamics simulations. AdoHcy is shown in stick.

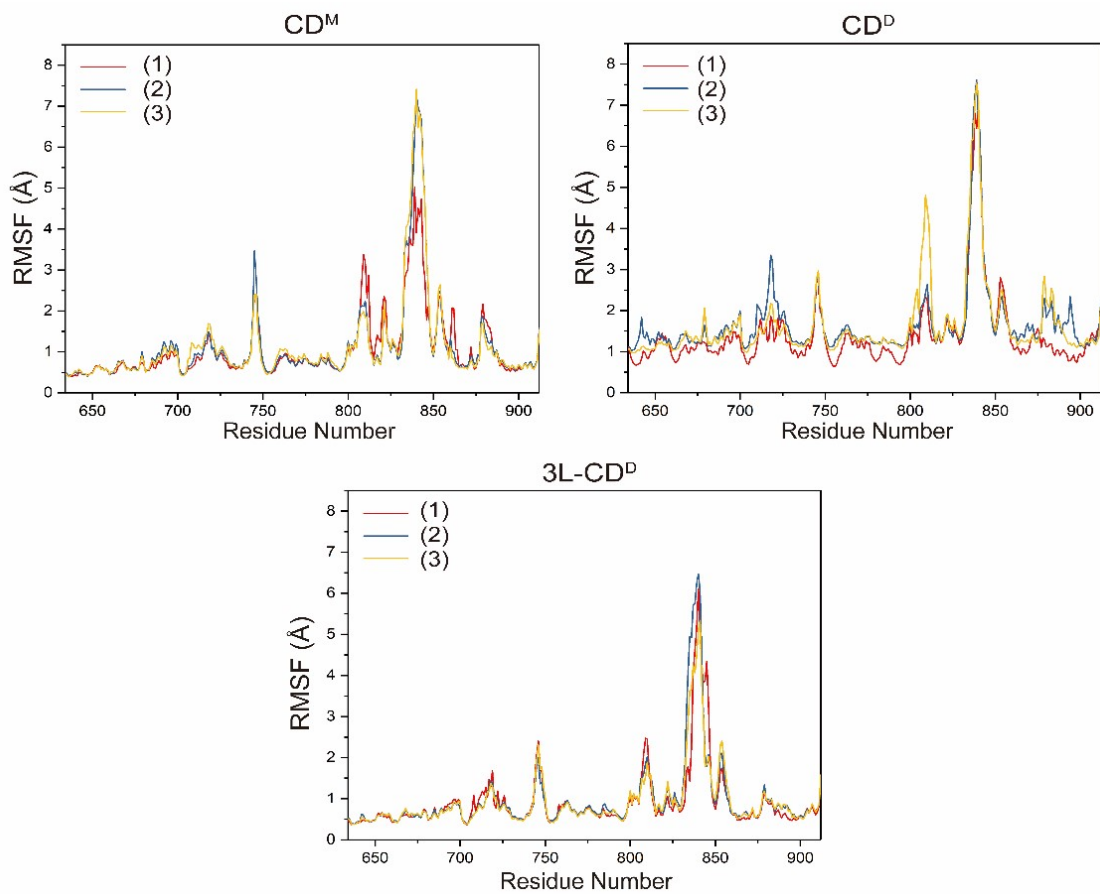

**Figure S2.** Residue-based RMSFs calculated from the three replicas of the CD monomer, homodimer, and heterotetramer systems.

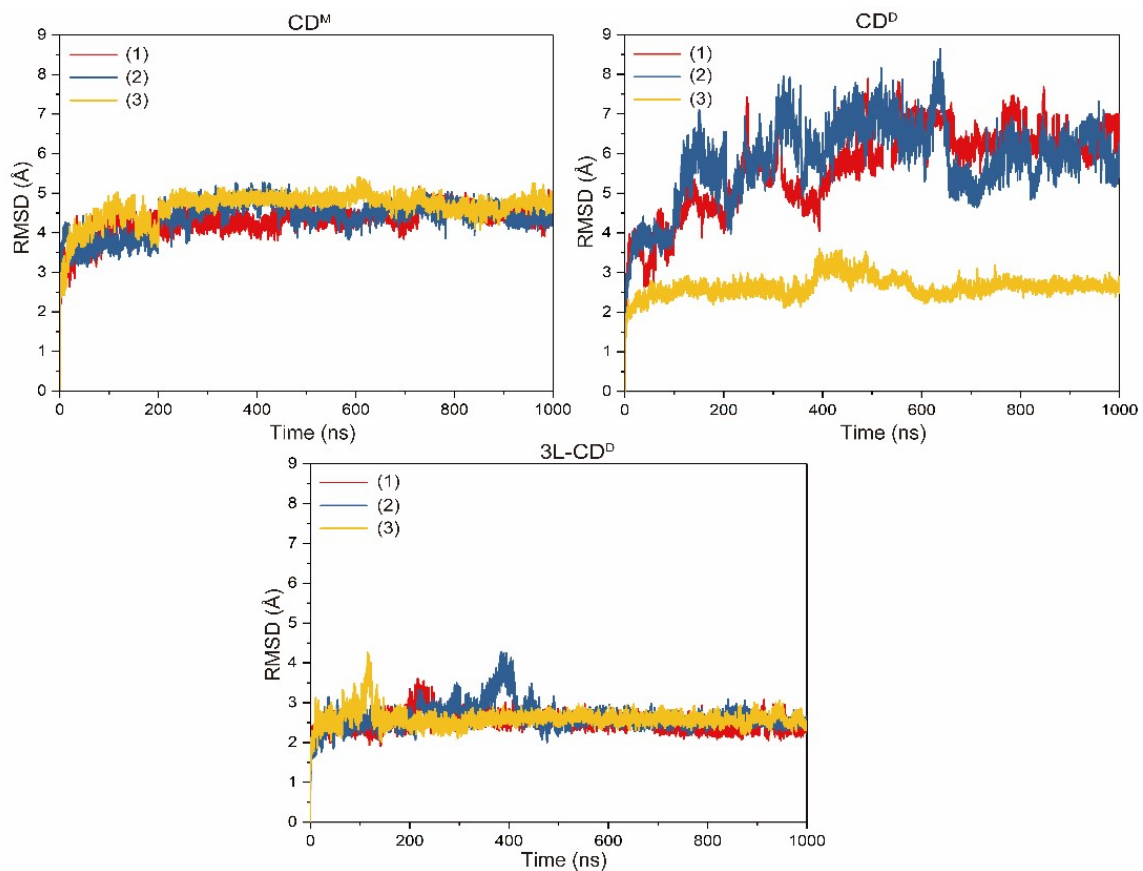

**Figure S3.** Three replicas of the RMSDs of the CD monomer, homodimer, and heterotetramer over the simulation time.

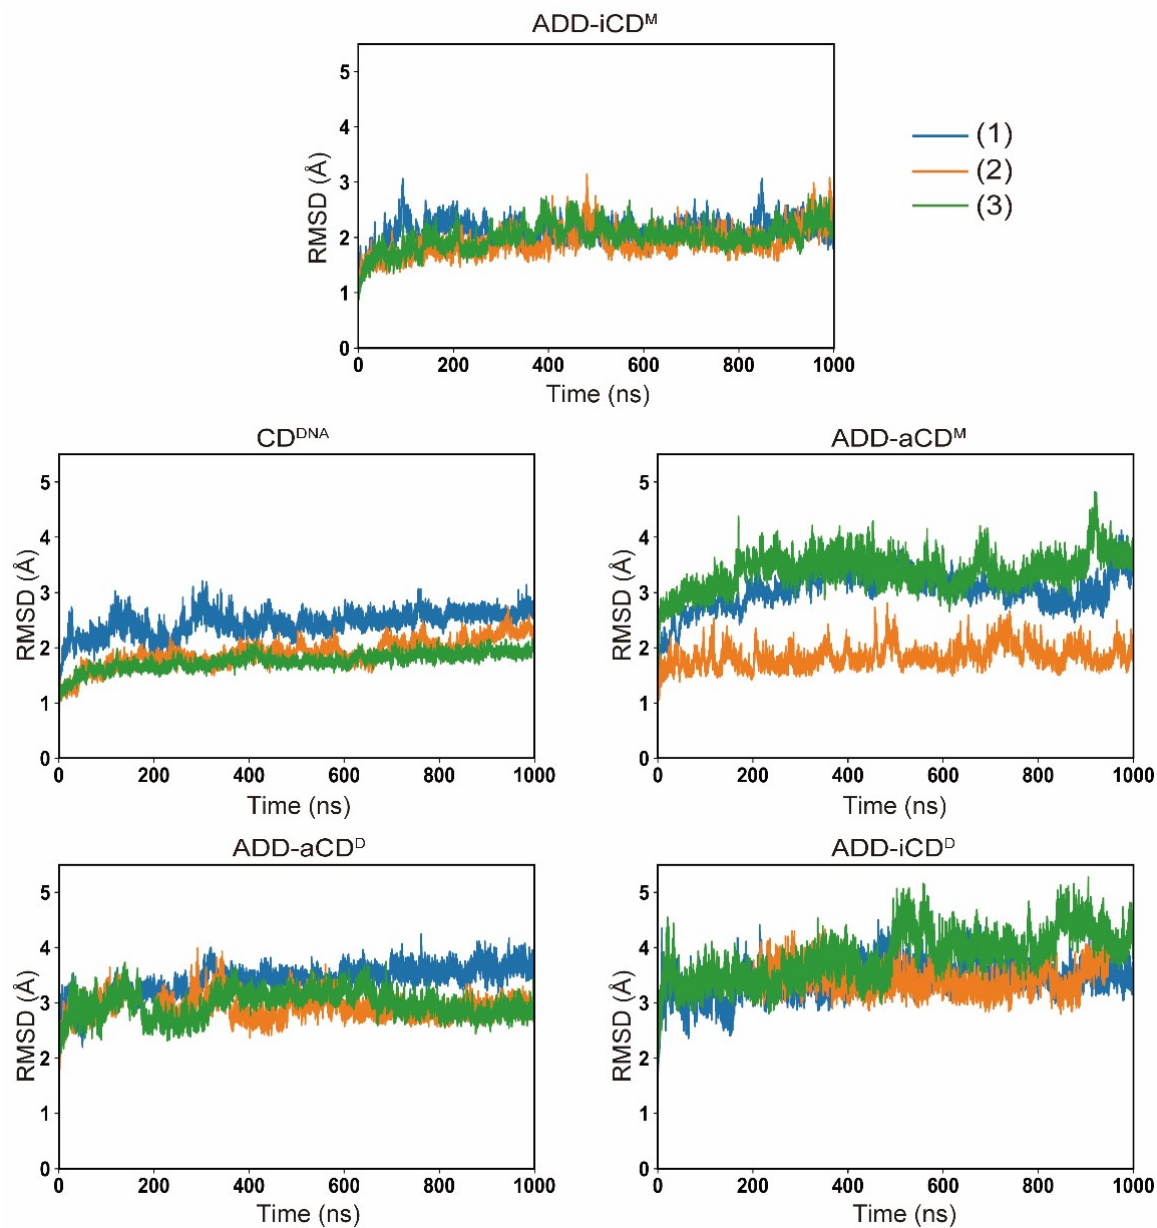

**Figure S4.** Three replicas of the RMSDs of the ADD-iCD<sup>M</sup>, CD<sup>DNA</sup>, ADD-aCD<sup>M</sup>, ADD-aCD<sup>D</sup>, ADD-iCD<sup>D</sup> over the simulation time.

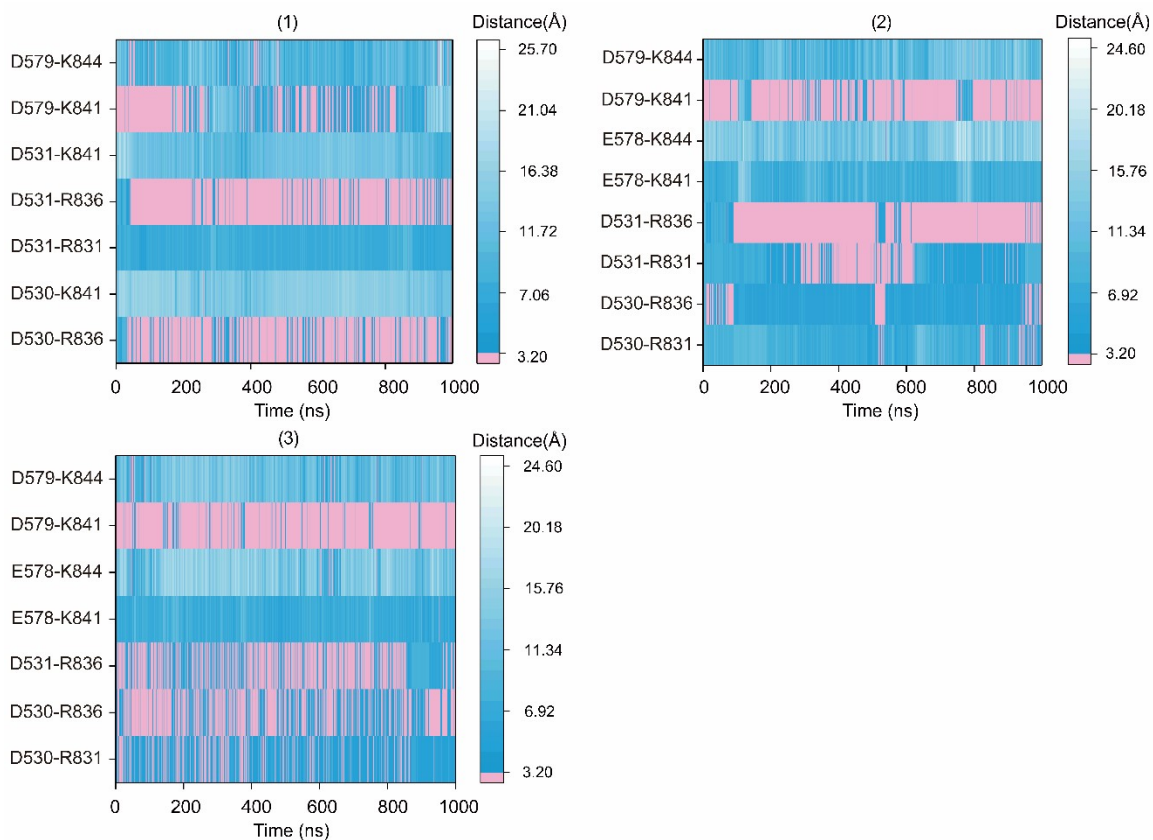

**Figure S5.** Salt bridges between the ADD domain and the TRD loop in ADD-iCD<sup>M</sup> as a function of the simulation time (three replicas). The color bar represents the O-N distance between the acidic and basic side chain of the salt bridge pairs.

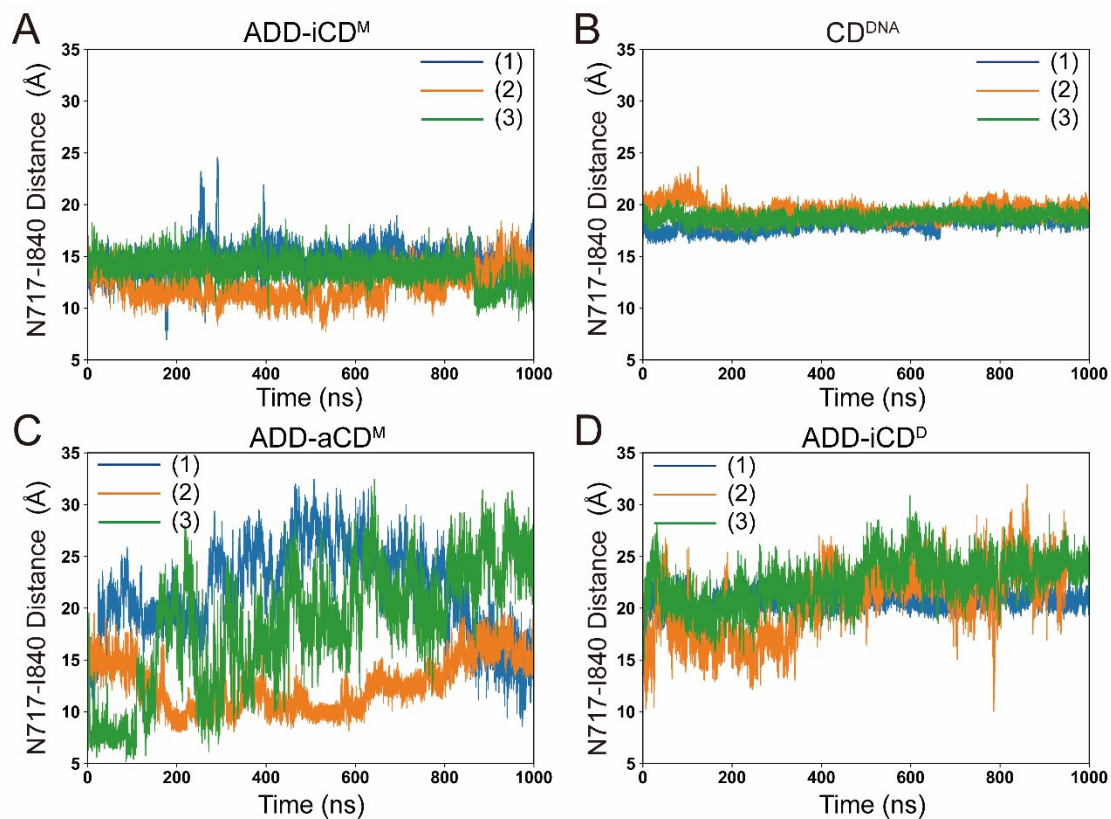

**Figure S6.** The center-of-mass distances (three replicas) between the I840 (TRD loop) and the N717 (catalytic loop) as a function of the simulation time in ADD-iCD<sup>M</sup> (A), CD<sup>DNA</sup> (B), ADD-aCD<sup>M</sup> (C) and ADD-iCD<sup>D</sup> (D).

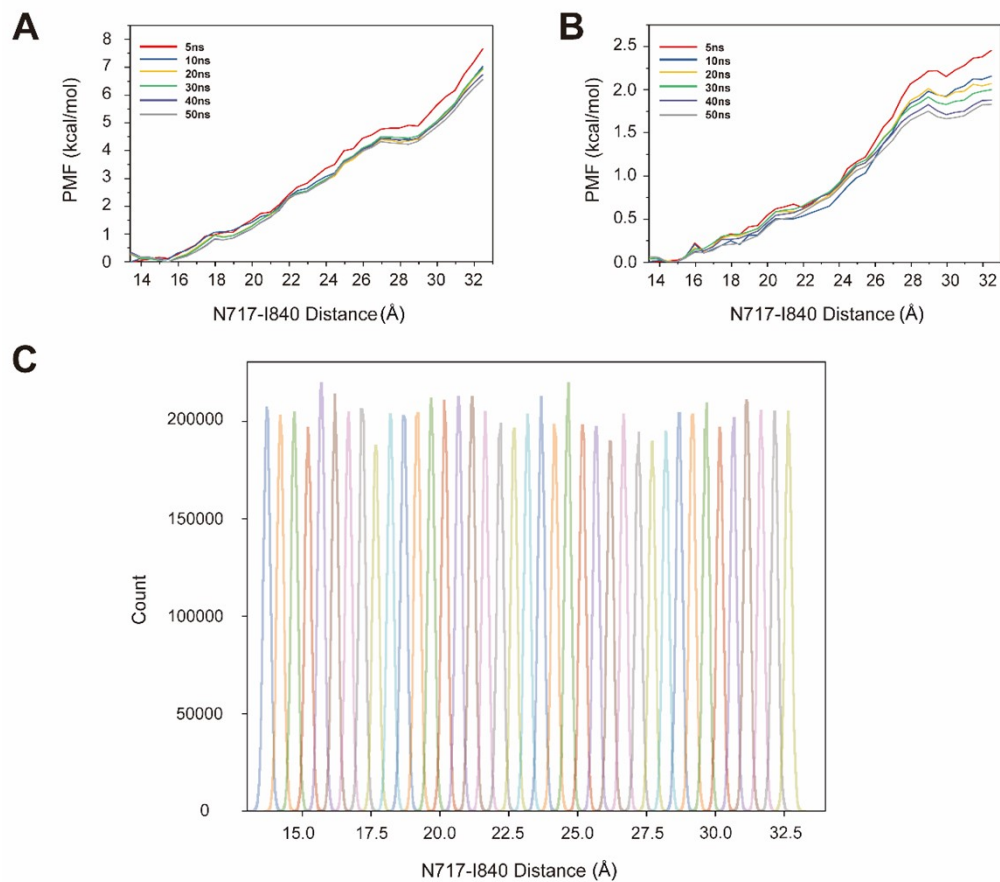

**Figure S7.** The convergence of the umbrella sampling for the systems (A) ADD-iCD<sup>M</sup> and (B) CD<sup>M</sup>. (C) The histogram of the umbrella sampling for the system ADD-iCD<sup>M</sup>.

**Table S1.** The densest clustered motion and max number of the cluster regions based on cluster-based wavelet feature extraction for CD<sup>M</sup>, CD<sup>D</sup>, and 3L-CD<sup>D</sup>.

| System                 | The densest clustered region | Total number of clusters |
|------------------------|------------------------------|--------------------------|
| CD <sup>M</sup> (1)    | S807-D811                    | 601                      |
| CD <sup>M</sup> (2)    | K783-H789                    | 580                      |
| CD <sup>M</sup> (3)    | K693-Q696                    | 634                      |
| CD <sup>D</sup> (1)    | R771-V912                    | 333                      |
| CD <sup>D</sup> (2)    | A610-K812                    | 47                       |
| CD <sup>D</sup> (3)    | A610-P718                    | 295                      |
| 3L-CD <sup>D</sup> (1) | L723-H739                    | 1111                     |
| 3L-CD <sup>D</sup> (2) | H789-G796                    | 323                      |
| 3L-CD <sup>D</sup> (3) | P777-V850                    | 1311                     |



**Table S2.** H-bond occupancy (larger than 50% listed) in three replicas

| System               | Interface            | (1)                    |             | (2)                    |              | (3)                    |             |      |
|----------------------|----------------------|------------------------|-------------|------------------------|--------------|------------------------|-------------|------|
|                      |                      | H-bond <sup>a</sup>    | Occupancy % | H-bond                 | Occupancy %  | H-bond                 | Occupancy % |      |
| ADD-iCD <sup>M</sup> | ADD-TRD loop         | D531-R831              | 76.6        | D531-R836 <sup>b</sup> | 69.8         | D531-R836 <sup>c</sup> | 59.8        |      |
|                      |                      | D531-R836              | 52.5        | D531-R836 <sup>b</sup> | 56.4         | D531-R836 <sup>c</sup> | 54.7        |      |
|                      | TRD loop-TRD loop    | K844-F848              | 52.         | K844-F848              | 77.7         | I833-R836              | 93.2        |      |
|                      |                      | Q842-Q842 <sup>d</sup> | 5<br>50.5   | K844-H847<br>I833-R836 | 59.2<br>50.2 | K844-H847              | 56.4        |      |
| ADD-iCD <sup>D</sup> | ADD-TRD loop         | K841-K577              | 83.8        | N552-R831              | 64.0         | R544-Q842              | 75.7        |      |
|                      |                      | D530-R831              | 80.6        |                        |              | E545-R836              | 52.5        |      |
|                      |                      | V546-Q842              | 66.1        |                        |              |                        |             |      |
|                      | TRD loop-TRD loop    | R836-S839              | 93.6        | R831-T834              | 81.0         | S839-Q842              | 80.5        |      |
|                      |                      | T835-N838              | 87.6        | K844-H847              | 59.5         | S837-Q842              | 76.2        |      |
|                      |                      | I833-R831              | 79.5        | Q846-R831              | 58.2         | D845-F848              | 67.0        |      |
|                      |                      | R831-T834              | 63.0        | S839-K841              | 52.1         | S839-K841              | 61.8        |      |
|                      |                      | D845-F848              | 58.6        | D845-F848              | 50.2         | K844-H847              | 54.8        |      |
|                      |                      | G843-Q846              | 54.0        |                        |              |                        |             |      |
|                      | ADD-aCD <sup>M</sup> | TRD loop-TRD loop      | K844-H847   | 65.9                   | G843-H847    | 85.2                   | K844-F848   | 85.2 |
|                      |                      |                        | K844-F848   | 61.5                   | S837-I840    | 69.4                   | K844-H847   | 81.8 |
|                      | ADD-aCD <sup>D</sup> |                        | Q846-R831   | 85.9                   | Q846-R83     | 84.9                   | Q846-R831   | 71.2 |

|                   |                      |           |      |                        |      |            |           |      |
|-------------------|----------------------|-----------|------|------------------------|------|------------|-----------|------|
| CD <sup>DNA</sup> | TRD loop-TRD<br>loop | H847-Q842 | 97.8 | S839-T834              | 94.2 | N838-G843  | 91.2      |      |
|                   |                      | Q842-R831 | 95.6 | R836-S839              | 91.7 | S839-T834  | 89.7      |      |
|                   |                      | I840-Q842 | 94.0 | R836-S839              | 83.0 | S839-Q842  | 81.2      |      |
|                   |                      | G843-Q846 | 79.6 | G843-Q846              | 82.1 | G843-Q846  | 78.8      |      |
|                   |                      | R836-S839 | 73.8 | S837-I840              | 79.3 | R836-S839  | 75.0      |      |
|                   |                      | Q842-H847 | 72.5 | T834-R836              | 67.8 | Q842-D845  | 69.9      |      |
|                   |                      | R836-S839 | 68.1 | N838-G843              | 53.7 | T834-R836  | 68.8      |      |
|                   |                      | S839-T834 | 63.1 | S839-Q842              | 52.8 | R836-S839  | 61.1      |      |
|                   | TRD loop-DNA         | G6-T835   | 66.6 |                        |      |            | S837-I840 | 53.5 |
|                   |                      | G6-T835   | 66.1 | G6-T835                | 83.7 | G6-T835    |           |      |
|                   |                      | G4-T832   | 60.6 | G6-T835                | 83.1 | G6-T835    |           |      |
|                   |                      | G4-T832   | 57.4 | T835-T11' <sup>e</sup> | 61.0 | T835- T11' |           |      |
|                   |                      | T3-R831   | 55.1 | T11'-R836              | 51.3 | G4-R831    |           |      |
|                   |                      |           |      |                        |      |            |           |      |

<sup>a</sup>The hydrogen bond pairs are arranged in the order of hydrogen bond acceptor - hydrogen bond donor.

<sup>b</sup>The atoms OD2 and OD1 of D531 formed hydrogen bonds with atoms HH22 and HH12 of R836, respectively, with an occupancy of 69.8% and 56.4%.

<sup>c</sup>The atoms OD1 and OD2 of D531 formed hydrogen bonds with atoms HH22 of R836, respectively, with an occupancy of 59.8% and 54.7%.

<sup>d</sup>The atoms OE1 and H of Q842 formed hydrogen bonds with an occupancy of 50.5%.

<sup>e</sup>The base with “'” represents the single strand of DNA where the unmethylated cytosine is located.

**Table S3.** The number of the H-bonds of the catalytic loop with the surrounding residues and within itself in the ADD-CD<sup>M</sup>, ADD-CD<sup>D</sup> and CD<sup>DNA</sup> systems.

| System                                                          | (1)            | (2)           | (3)           | Average       |
|-----------------------------------------------------------------|----------------|---------------|---------------|---------------|
| H-bonds between the catalytic loop and its surrounding residues |                |               |               |               |
| ADD-aCD <sup>M</sup>                                            | $8.3 \pm 1.1$  | $7.5 \pm 1.6$ | $6.4 \pm 1.6$ | $7.4 \pm 1.7$ |
| ADD-iCD <sup>M</sup>                                            | $6.6 \pm 1.1$  | $6.3 \pm 1.3$ | $7.2 \pm 1.6$ | $6.7 \pm 1.4$ |
| CD <sup>DNA</sup>                                               | $10.1 \pm 1.9$ | $9.7 \pm 2.3$ | $9.8 \pm 2.0$ | $9.9 \pm 2.1$ |
| ADD-aCD <sup>D</sup>                                            | $7.0 \pm 1.7$  | $6.3 \pm 1.2$ | $6.2 \pm 1.2$ | $6.5 \pm 1.4$ |
| ADD-iCD <sup>D</sup>                                            | $6.1 \pm 1.4$  | $8.8 \pm 1.4$ | $8.9 \pm 1.6$ | $7.9 \pm 2.0$ |
| H-bonds within the catalytic loop itself                        |                |               |               |               |
| ADD-aCD <sup>M</sup>                                            | $8.8 \pm 1.7$  | $7.0 \pm 1.5$ | $7.5 \pm 1.9$ | $7.8 \pm 1.9$ |
| ADD-iCD <sup>M</sup>                                            | $7.0 \pm 1.4$  | $7.1 \pm 1.4$ | $7.2 \pm 1.4$ | $7.1 \pm 1.4$ |
| CD <sup>DNA</sup>                                               | $7.4 \pm 1.5$  | $7.2 \pm 1.5$ | $7.5 \pm 1.6$ | $7.4 \pm 1.5$ |
| ADD-aCD <sup>D</sup>                                            | $7.7 \pm 1.8$  | $7.2 \pm 1.4$ | $7.0 \pm 1.5$ | $7.3 \pm 1.6$ |
| ADD-iCD <sup>D</sup>                                            | $7.2 \pm 1.5$  | $7.0 \pm 1.6$ | $7.0 \pm 2.1$ | $7.1 \pm 1.7$ |

**Table S4.** The center-of-mass distances ( $\text{\AA}$ ) between the I840 (TRD loop) and the N717 (catalytic loop) as a function of the simulation time in ADD-iCD<sup>M</sup>, CD<sup>DNA</sup>, ADD-aCD<sup>M</sup> and ADD-CD<sup>D</sup>.

| System               | (1)            | (2)            | (3)            | Average        |
|----------------------|----------------|----------------|----------------|----------------|
| ADD-iCD <sup>M</sup> | $14.6 \pm 1.4$ | $12.2 \pm 1.4$ | $13.8 \pm 1.2$ | $13.5 \pm 1.7$ |
| CD <sup>DNA</sup>    | $18.1 \pm 0.6$ | $19.5 \pm 0.8$ | $18.8 \pm 0.5$ | $18.8 \pm 0.8$ |
| ADD-aCD <sup>M</sup> | $21.7 \pm 4.3$ | $12.5 \pm 2.4$ | $18.3 \pm 5.8$ | $17.5 \pm 5.8$ |
| ADD-iCD <sup>D</sup> | $20.7 \pm 0.8$ | $20.6 \pm 3.3$ | $22.6 \pm 2.1$ | $21.3 \pm 2.5$ |
